# Supplementary material for: Alpha-synuclein is a DNA binding protein that modulates DNA repair with implications for Lewy body disorders
Source: PubMed Central journal article supplement (PMC6662836; doi:10.1038/s41598-019-47227-z), 2019-07-29

## Supplementary Data File

Title: Alpha-synuclein is a DNA binding protein that modulates DNA repair with implications for Lewy body disorders

Authors: Allison J. Schaser<sup>+1</sup>, Valerie R. Osterberg<sup>+1</sup>, Sydney E. Dent<sup>1</sup>, Teresa L. Stackhouse<sup>1</sup>, Colin M. Wakeham<sup>2</sup>, Sydney W. Boutros<sup>3</sup>, Leah J. Weston<sup>1</sup>, Nichole Owen<sup>4</sup>, Tamily A. Weissman<sup>5</sup>, Esteban Luna<sup>6</sup>, Jacob Raber<sup>3</sup>, Kelvin C. Luk<sup>6</sup>, Amanda K. McCullough<sup>4,7</sup>, Randall L. Woltjer<sup>8</sup>, Vivek K. Unni<sup>1,9,\*</sup>

### Affiliations:

<sup>1</sup>Department of Neurology & Jungers Center for Neurosciences Research; Oregon Health & Science University; Portland, OR, 97239; USA

<sup>2</sup>Neuroscience Graduate Program, Vollum Institute; Oregon Health & Science University; Portland, OR, 97239; USA

<sup>3</sup>Departments of Behavioral Neuroscience, Neurology, and Radiation Medicine and Division of Neuroscience, ONPRC; Oregon Health & Science University; Portland, Oregon, 970239, USA

<sup>4</sup>Department of Molecular and Medical Genetics; Oregon Health & Science University; Portland, OR, 97239; USA

<sup>5</sup>Department of Biology; Lewis & Clark College; Portland, OR, 97219; USA

<sup>6</sup>Department of Pathology and Laboratory Medicine and Center for Neurodegenerative Disease Research; University of Pennsylvania Perelman School of Medicine; Philadelphia, PA, 19104; USA

<sup>7</sup>Oregon Institute of Occupational Health Sciences; Oregon Health & Science University; Portland, OR, 97239; USA

<sup>8</sup>Department of Pathology, Division of Neuropathology; Oregon Health & Science University; Portland, OR, 97239; USA

<sup>9</sup>OHSU Parkinson Center; Oregon Health & Science University; Portland, OR, 97239; USA

\*These authors contributed equally to this work.

Figure Legends:

**Figure 1A Supplemental. Nuclear alpha-synuclein staining is specific with some antibodies but not others in HAP1 cells.** Two commercially available alpha-synuclein ( $\alpha$ Syn) antibodies, Syn1 and EPR20535, showed clear staining in the nucleus which was essentially abolished in SNCA knock-out ( $\alpha$ Syn KO) cells. Three other antibodies, 4B12, 81A and the S129-phospho-synuclein antibody EP1536Y, showed non-specific nuclear staining which did not change appreciably in  $\alpha$ Syn KO cells. Scale bar 10 $\mu$ m.

**Figure 1B Supplemental. Nuclear alpha-synuclein staining is found in neurons in mouse cortex.** Representative image of endogenous alpha-synuclein ( $\alpha$ Syn) staining in WT animals showed clear nuclear foci in cortical neurons labeled by the marker NeuN (yellow arrowhead) and much less staining observed in glial cells (NeuN-negative, white arrowhead). Scale bar 10 $\mu$ m.

**Figure 5 Supplemental. Alpha-synuclein binds double-stranded DNA.** Left: EMSA with 300 bp dsDNA on a 10% polyacrylamide gel shows an increase in shifted species with increasing alpha-synuclein ( $\alpha$ Syn) and S129-phospho-synuclein (pSyn) concentration.  $\alpha$ Syn causes a larger shift and shifts a higher percentage of DNA than pSyn. Middle: Western blot membrane image of alpha-synuclein antibody staining after transfer of proteins to a nylon membrane. Merged image shows DNA bands (red),  $\alpha$ Syn and pSyn protein (green) and colocalization (yellow). Right: Group data showing significant differences between  $\alpha$ Syn, pSyn and the control protein glutathione S-transferase (GST, GST gel not shown) at 57  $\mu$ M: GST fraction shifted =  $0.034 \pm 0.021$ , N=3; pSyn =  $0.58 \pm 0.030$ , N=3,  $\alpha$ Syn =  $0.86 \pm 0.049$ , N=3,  $F(2, 6) = 141.4$ ,  $p = 0.0001$ ,

ANOVA, post-hoc Tukey test: GST vs. pSyn  $p=0.0001$ , GST vs.  $\alpha$ Syn  $p=0.0001$ , pSyn vs.  $\alpha$ Syn  $p=0.0034$ .

**Figure 6 Supplemental. Nuclear alpha-synuclein is rapidly recruited to sites of laser-**

**induced DNA damage in culture.** (A) Mouse cortical neurons imaged in culture expressing

S129D, S129A, A53T/S129D, A53T/S129A, or 142E Syn-GFP. Baseline ( $t=4$  sec) and after

laser-induced damage (LID,  $t=6, 12, 18$  sec) images show accumulation of the various Syn-GFP

forms at DNA damage sites (white arrows). Scale bar  $10\mu\text{m}$ . (B) Left: Group data from different

constructs (142E Syn-GFP Enrichment Ratio  $=2.82\pm 0.32$ ,  $N=7$  cells, S129D Syn-GFP

Enrichment Ratio  $=4.76\pm 0.83$ ,  $N=7$  cells, S129A Syn-GFP Enrichment Ratio  $=2.24\pm 0.53$ ,  $N=9$

cells, A53T/S129D Syn-GFP Enrichment Ratio  $=2.53\pm 0.51$ ,  $N=4$  cells, A53T/S129A Syn-GFP

Enrichment Ratio  $=1.79\pm 0.11$ ,  $N=4$  cells;  $F(4,26)=3.865$ ,  $p=0.0136$ , ANOVA, post-hoc Tukey

tests: S129D vs. S129A  $p=0.0177$ , S129D vs. A53T/S129A  $p=0.0261$ , all other comparisons

$p>0.1298$ ). Right: Group data from S129D, S129A, A53T/S129D, A53T/S129A, and 142E Syn-

GFP cultures (S129D Syn-GFP Enrichment Ratio baseline  $=1.01\pm 0.03$ , after LID  $=4.76\pm 0.83$ ,

$N=7$  cells, paired t-test  $p=0.0007$ ; S129A Syn-GFP baseline  $=1.05\pm 0.05$ , after LID  $=2.24\pm 0.53$ ,

$N=9$  cells, paired t-test  $p=0.0399$ ; A53T/S129D Syn-GFP baseline  $=0.98\pm 0.05$ , after LID  $=$

$2.53\pm 0.51$ ,  $N=4$  cells, paired t-test  $p=0.0230$ ; A53T/S129A Syn-GFP baseline  $=1.05\pm 0.02$ , after

LID  $=1.79\pm 0.11$ ,  $N=4$  cells, paired t-test  $p=0.0006$ ; 142E Syn-GFP baseline  $=1.03\pm 0.03$ , after

LID  $=2.82\pm 0.32$ ,  $N=7$  cells, paired t-test  $p=0.0001$ ).

**Figure 7A Supplemental. Lewy pathology is associated with increased DSBs in mouse**

**hippocampal neurons in culture.** Cultured mouse hippocampal neurons treated with PFFs or

PBS show large increases in nuclear  $\gamma$ H2AX staining in the PFF-treated group that forms Lewy

pathology 12 days after treatment (PBS =  $0.0018 \pm 0.0004$  foci/nucleus, N=3869 cells/4 replicates, PFF =  $0.011 \pm 0.003$  foci/nucleus, N=4514 cells/4 replicates, t-test  $p < 0.0001$ ). White squares represent areas shown at higher magnification in middle and right images. Scale bar 100 $\mu$ m.

**Figure 7B Supplemental.** Lewy pathology is associated with increased DSBs in human tissue. Neuronal somatic human Lewy inclusion (pSyn, white arrow) is associated with increased DSBs ( $\gamma$ H2AX, yellow arrowhead) compared to cell without Lewy pathology (white arrowhead).

**Table 1 Supplemental.**

| Antibody name | Nuclear labeling WT | Nuclear labeling SNCA KO |
|---------------|---------------------|--------------------------|
| Syn1          | +                   | -                        |
| EPR20535      | +                   | -                        |
| MJFR1         | +                   | +                        |
| EP1536Y       | +                   | +                        |

Figure 1A Supplemental

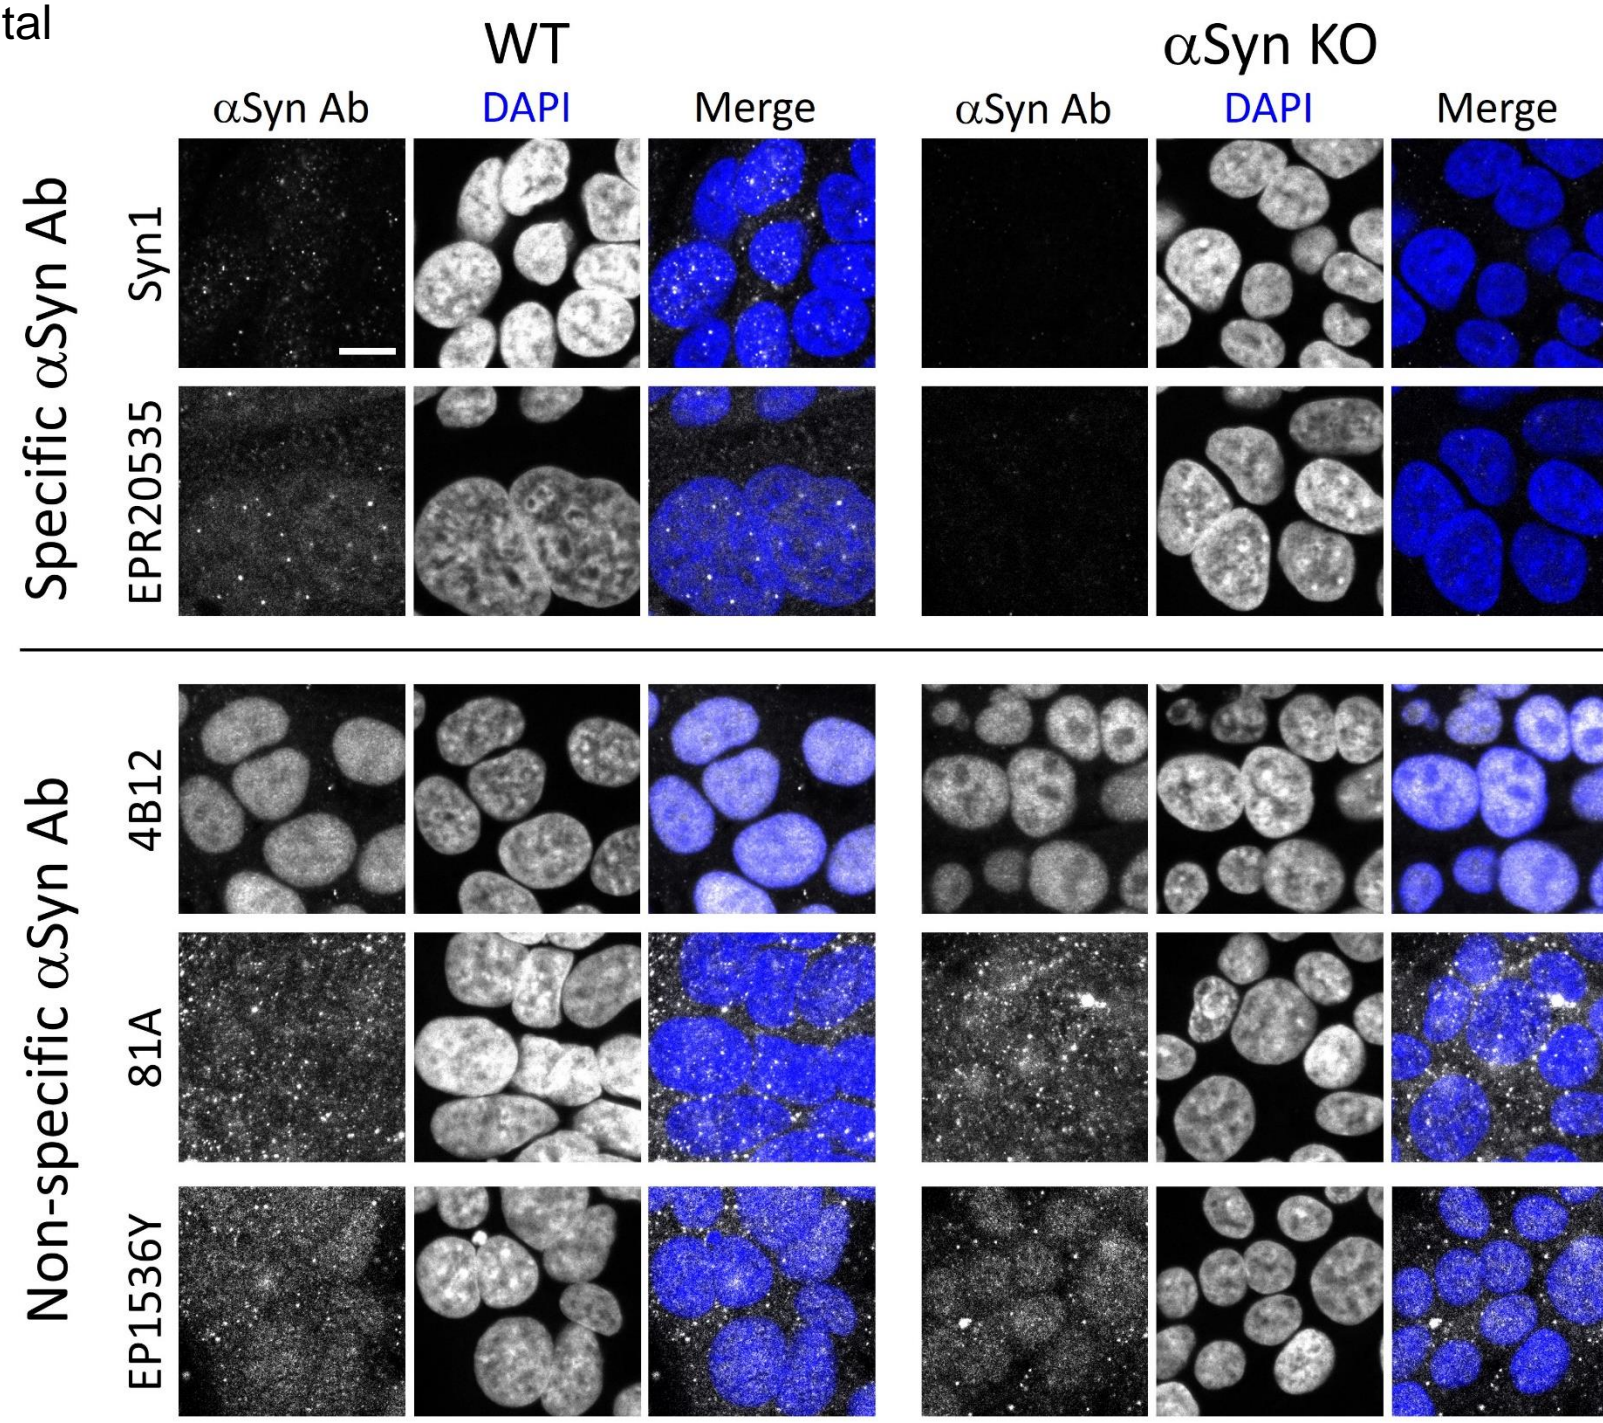

Figure 1B Supplemental

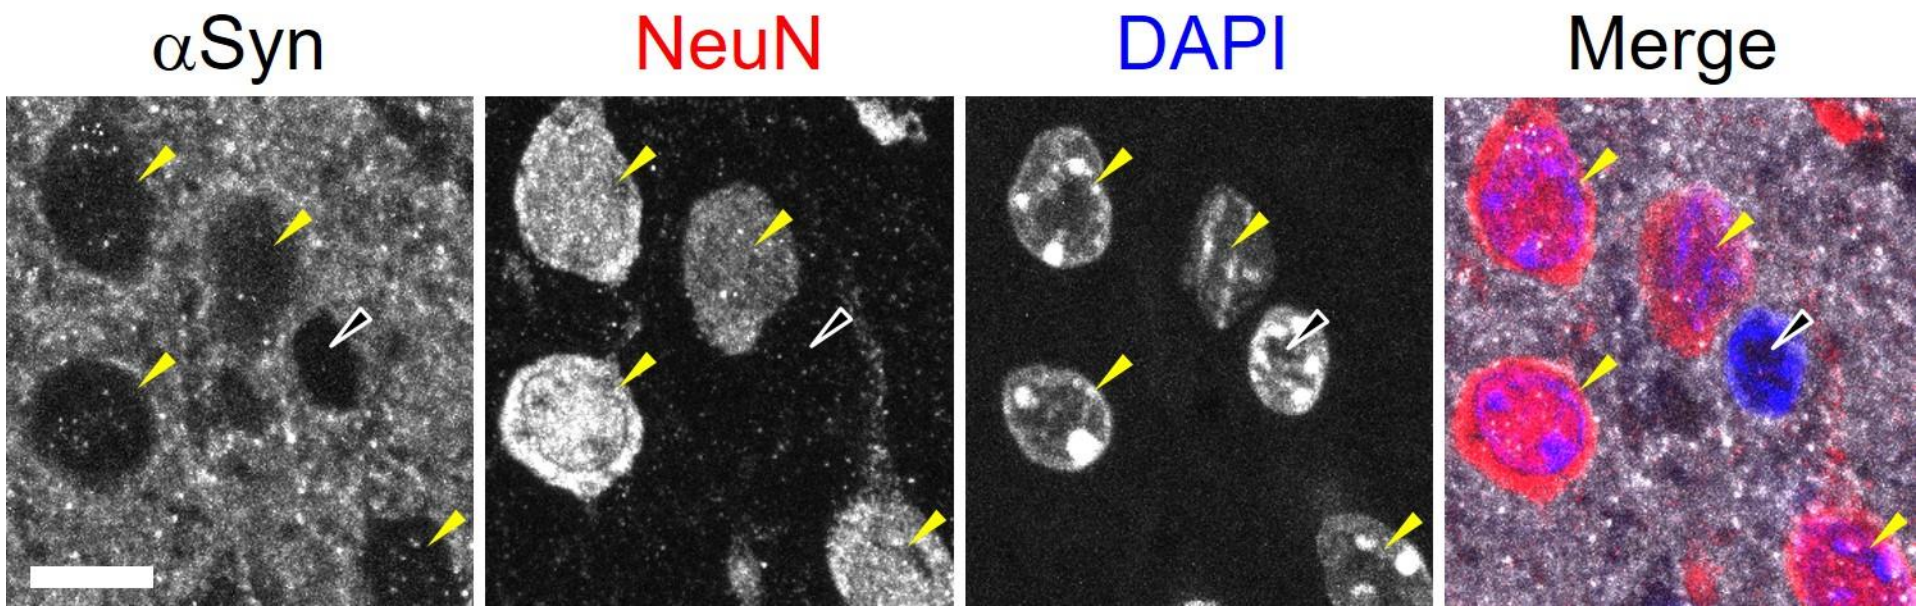

Figure 5 Supplemental

### Shifted DNA colocalizes with $\alpha$ Syn and pSyn

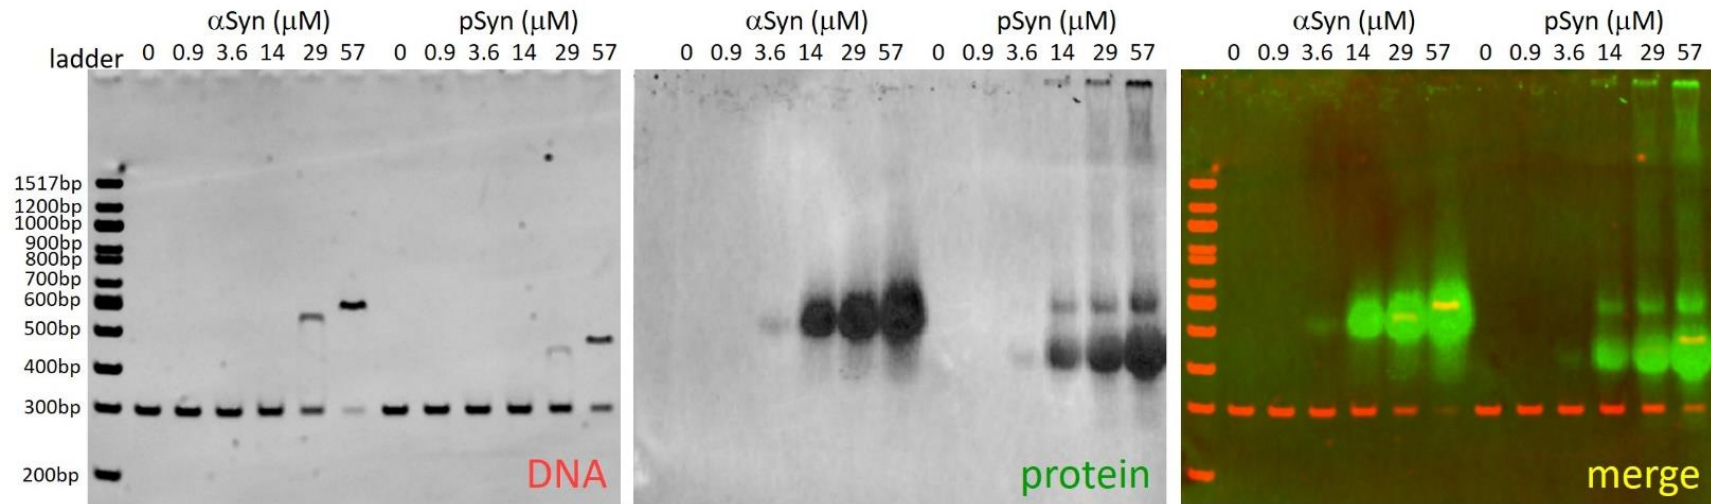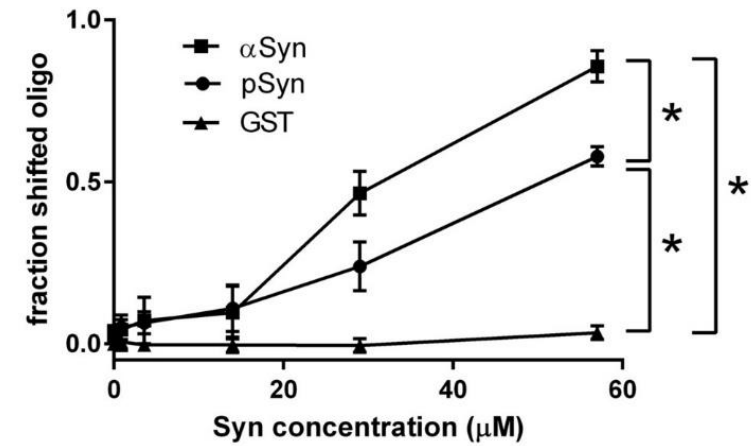

Figure 6 Supplemental

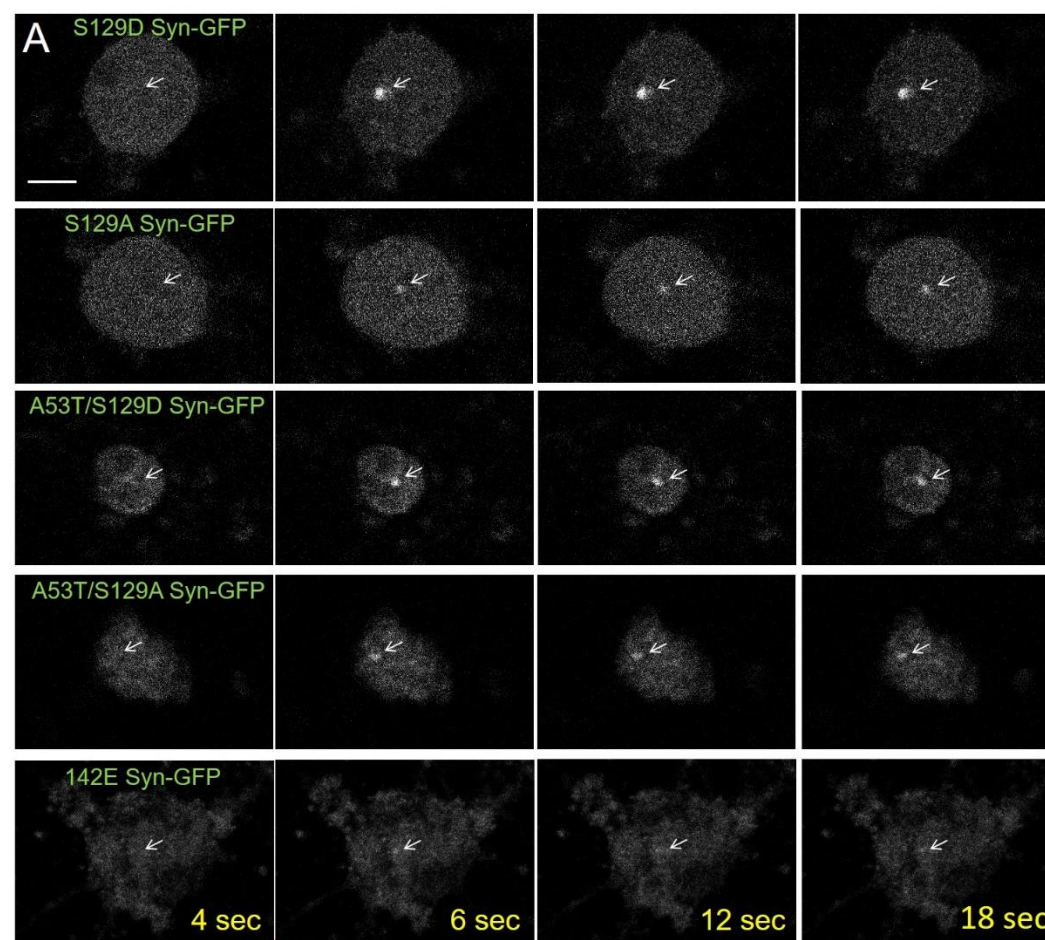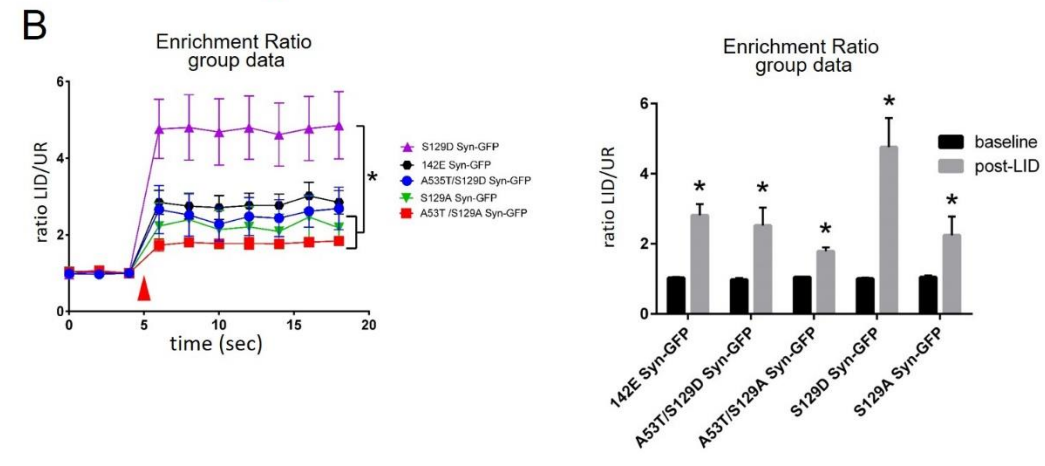



Figure 7A Supplemental

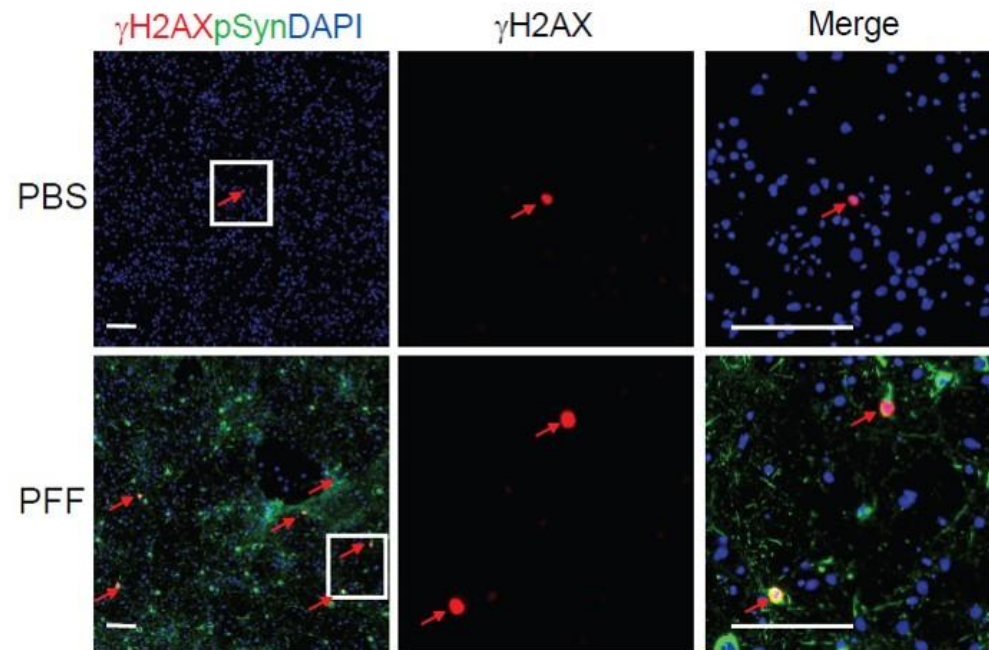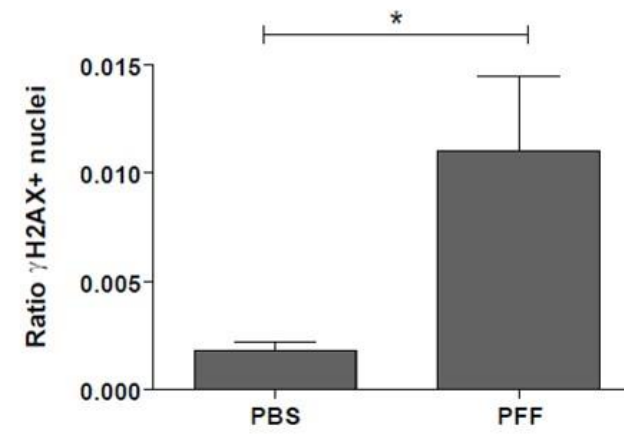

Figure 7B Supplemental

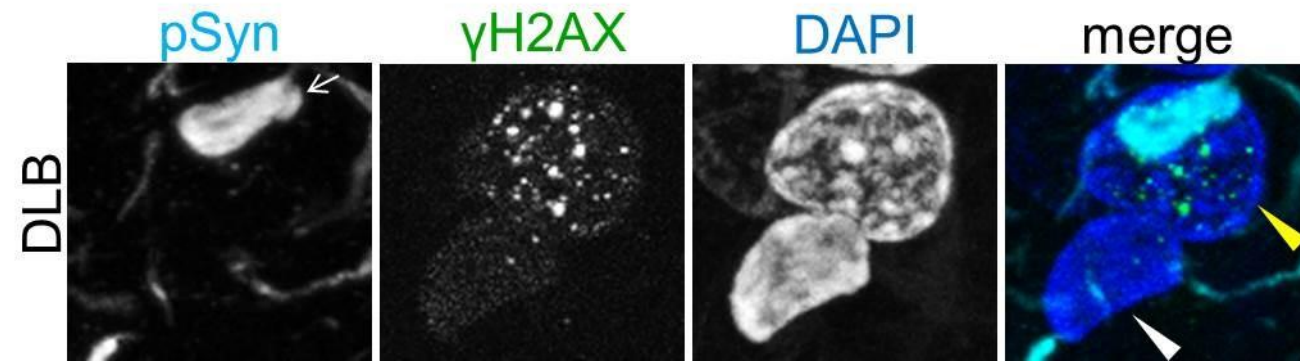

Supplement: 41598_2019_47227_MOESM1_ESM.pdf [file 41598_2019_47227_MOESM1_ESM.pdf]
